# Supplementary material
Source: PubMed Central journal article supplement (PMC3596002)
Supplement: NIHMS444622-supplement-1_si_001.pdf [file NIHMS444622-supplement-1_si_001.pdf]

## Supporting Information

### Temperature Independent Catalytic Two-Electron Reduction of Dioxygen by Ferrocenes with a Tris[2-(2-pyridyl)ethyl]amine-Copper(II) Catalyst in the Presence of Perchloric Acid

Dipanwita Das,<sup>†</sup> Yong-Min Lee,<sup>†</sup> Kei Ohkubo,<sup>§</sup> Wonwoo Nam,<sup>\*,†</sup> and Kenneth D. Karlin,<sup>\*,†,‡</sup>  
and Shunichi Fukuzumi<sup>\*,†,§</sup>

<sup>†</sup>*Department of Bioinspired Science, Ewha Womans University, Seoul 120-750, Korea*

<sup>‡</sup>*Department of Chemistry, The Johns Hopkins University, Baltimore, MD 21218, USA*

<sup>§</sup>*Department of Material and Life Science, Division of Advanced Science and Biotechnology, Graduate School of Engineering, Osaka University, Suita, Osaka 565-0871, Japan*

\*E-mail addresses: fukuzumi@chem.eng.osaka-u.ac.jp; karlin@jhu.edu;  
wwnam@ewha.ac.kr

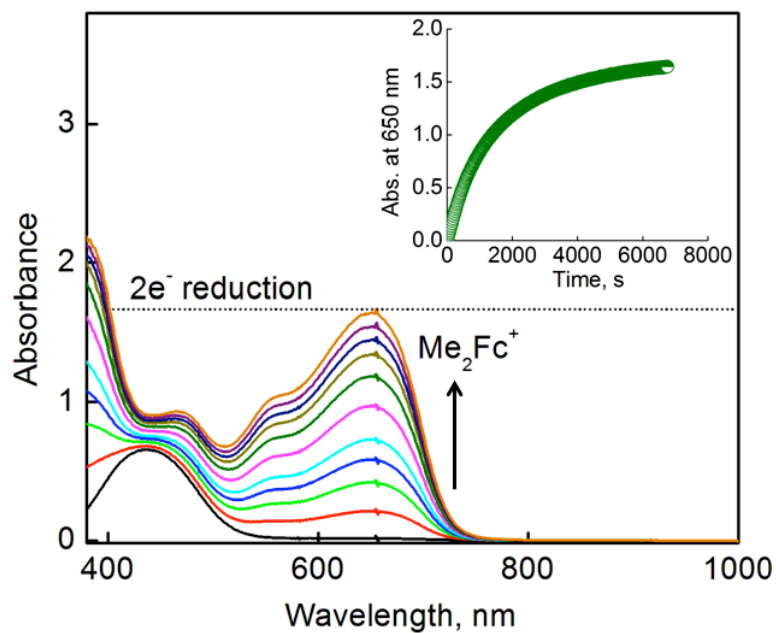

**Figure S1.** Absorption spectral changes in the two-electron reduction of O<sub>2</sub> ([O<sub>2</sub>] = 2.2 mM) by Me<sub>2</sub>Fc (10 mM) with **1** (0.040 mM) in the presence of HClO<sub>4</sub> (40 mM) in acetone at 298 K. The inset shows the time profile of absorbance at 650 nm due to Me<sub>2</sub>Fc<sup>+</sup>.

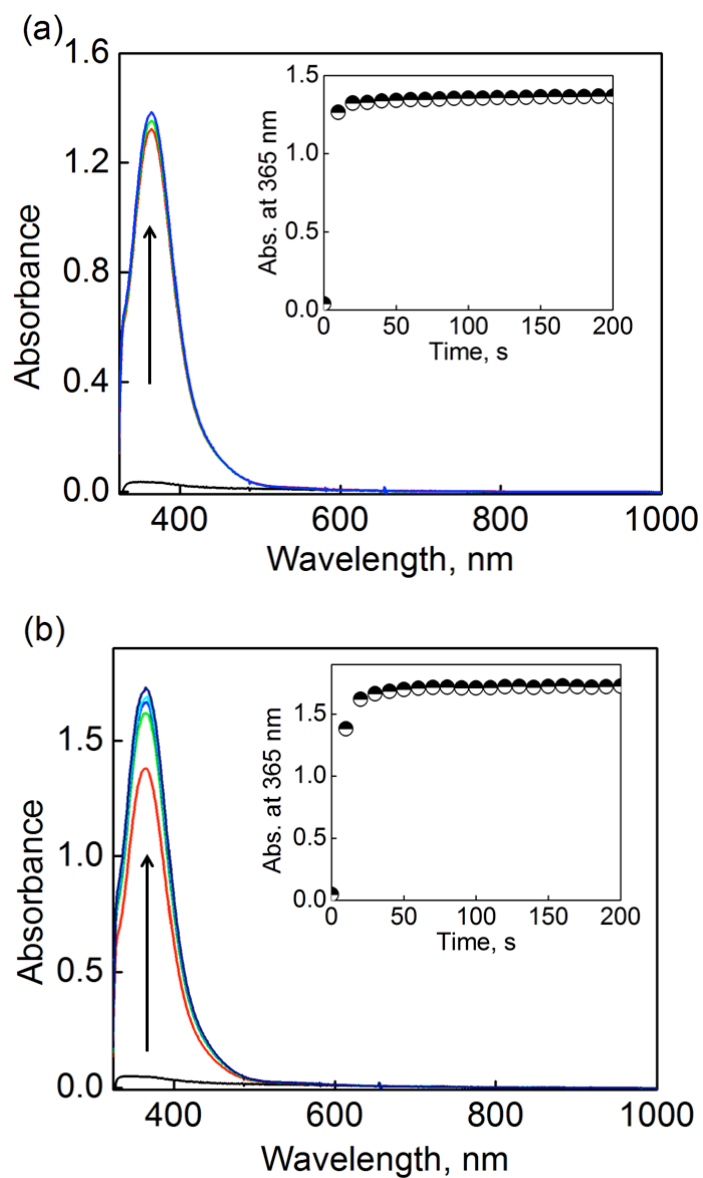

**Figure S2.** (a) Spectral changes observed in the reaction of NaI (0.20 M) with the diluted (40 times) acetone solution of the products at 298 K after the catalytic reduction of O<sub>2</sub> (2.2 mM) by Me<sub>2</sub>Fc (10 mM) with **1** (0.040 mM) in the presence of excess HClO<sub>4</sub> (40 mM) in acetone at 298 K. (b) Spectral changes observed in the reaction of the NaI (0.20 M) with H<sub>2</sub>O<sub>2</sub> (0.068 mM) in acetone at 298 K.

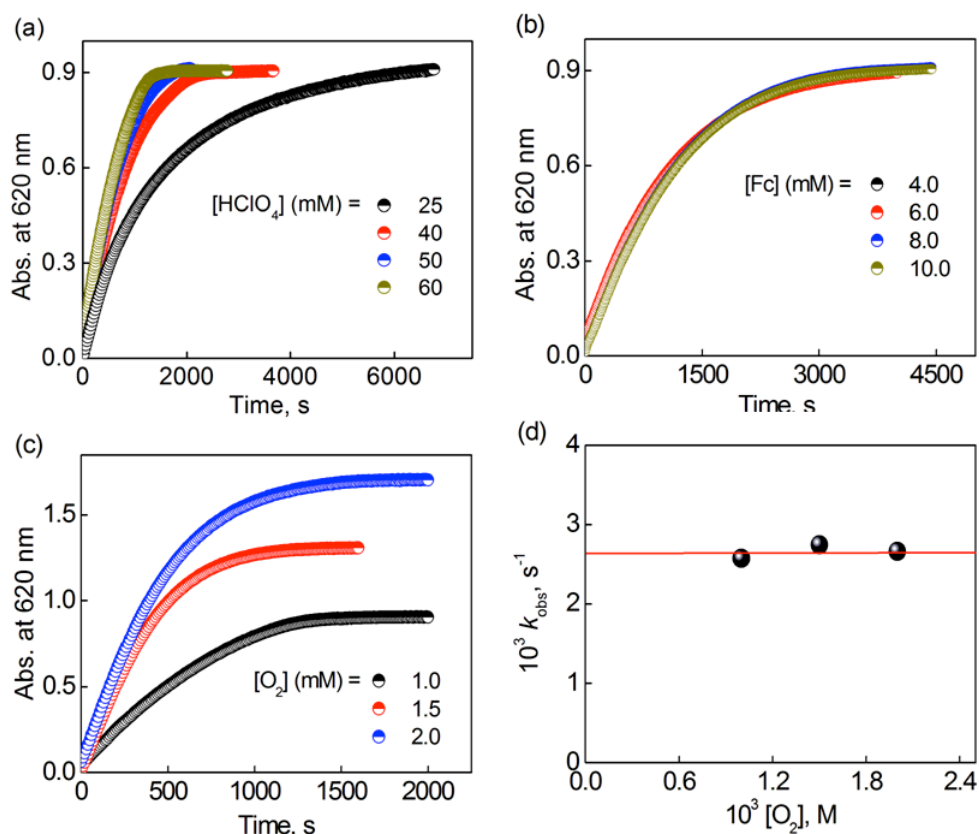

**Figure S3.** (a) Time profiles of the absorbance at 620 nm due to Fc<sup>+</sup> in the two-electron reduction of O<sub>2</sub> catalyzed by **1** (0.10 mM) with Fc (10 mM) in the presence of various concentrations of HClO<sub>4</sub> (25 mM (black), 40 mM (red), 50 mM (blue) and 60 mM (dark yellow)) in an acetone solution containing O<sub>2</sub> ([O<sub>2</sub>] = 1.0 mM) at 298 K. (b) Time profiles of the absorbance at 620 nm due to Fc<sup>+</sup> in the two-electron reduction of O<sub>2</sub> ([O<sub>2</sub>] = 1.0 mM) catalyzed by **1** (0.10 mM) with Fc (4.0 mM (black), 6.0 mM (red), 8.0 mM (blue) and 10 mM (dark yellow)) in the presence of HClO<sub>4</sub> (40 mM) in an acetone solution at 298 K. (c) Time profiles of the absorbance at 620 nm due to Fc<sup>+</sup> in the two-electron reduction of O<sub>2</sub> (1.0 mM (black), 1.5 mM (red) and 2.0 mM (blue)) catalyzed by **1** (0.10 mM) with Fc (10 mM) in the presence of HClO<sub>4</sub> (60 mM) in an acetone solution at 298 K and (d) plot of  $k_{\text{obs}}$  versus [O<sub>2</sub>] for the two-electron reduction of O<sub>2</sub> catalyzed by **1** (0.10 mM) with Fc (10 mM) in the presence of HClO<sub>4</sub> (60 mM) in an acetone solution at 298 K.

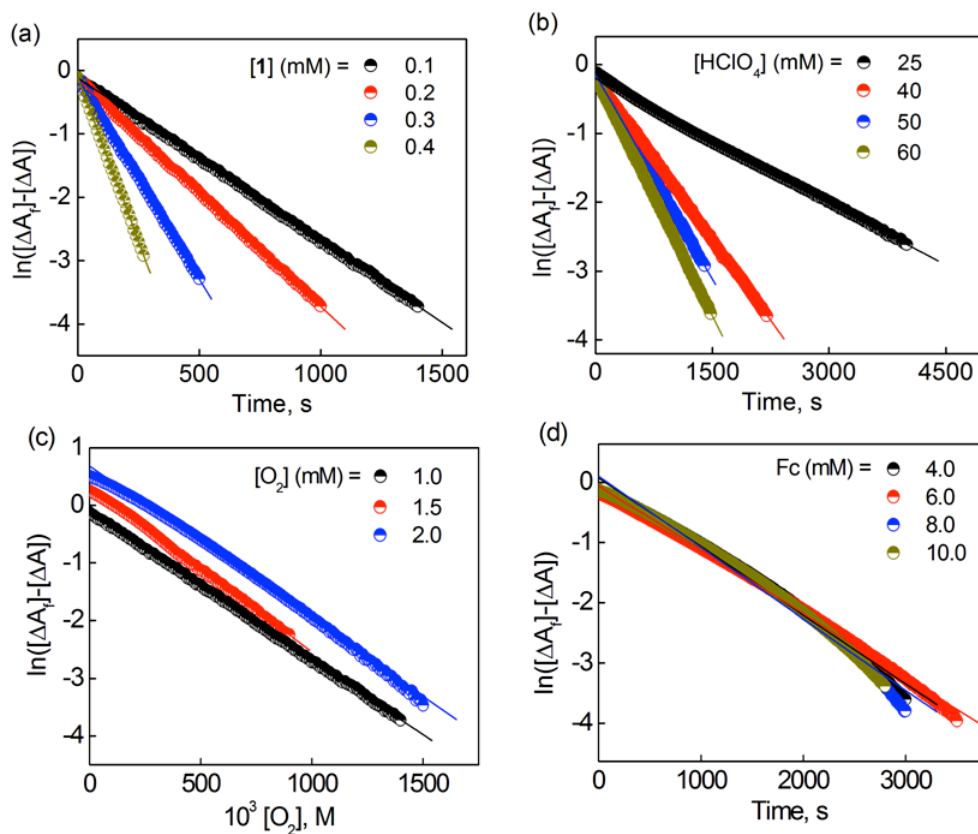

**Figure S4.** First-order plots of the formation of  $\text{Fc}^+$  at 298 K in the two-electron reduction of  $\text{O}_2$  catalyzed by (a) **1** (0.10 mM (black), 0.20 mM (red), 0.30 mM (blue) and 0.40 mM (dark yellow)) with Fc (10 mM) in the presence of  $\text{HClO}_4$  (60 mM) in an acetone solution containing  $\text{O}_2$  ( $[\text{O}_2] = 1.0$  mM), (b) **1** (0.10 mM) with Fc (10 mM) in the presence of various concentrations of  $\text{HClO}_4$  (25 mM (black), 40 mM (red), 50 mM (blue) and 60 mM (dark yellow)) in an acetone solution containing  $\text{O}_2$  ( $[\text{O}_2] = 1.0$  mM), (c) **1** (0.10 mM) with Fc (10 mM) in the presence of  $\text{HClO}_4$  (60 mM) in an acetone solution having various concentrations of  $\text{O}_2$  (1.0 mM (black), 1.5 mM (red) and 2.0 mM (blue)) and (d) **1** (0.10 mM) with Fc (4.0 mM (black), 6.0 mM (red), 8.0 mM (blue) and 10 mM (dark yellow)) in the presence of  $\text{HClO}_4$  (40 mM) in an acetone solution.

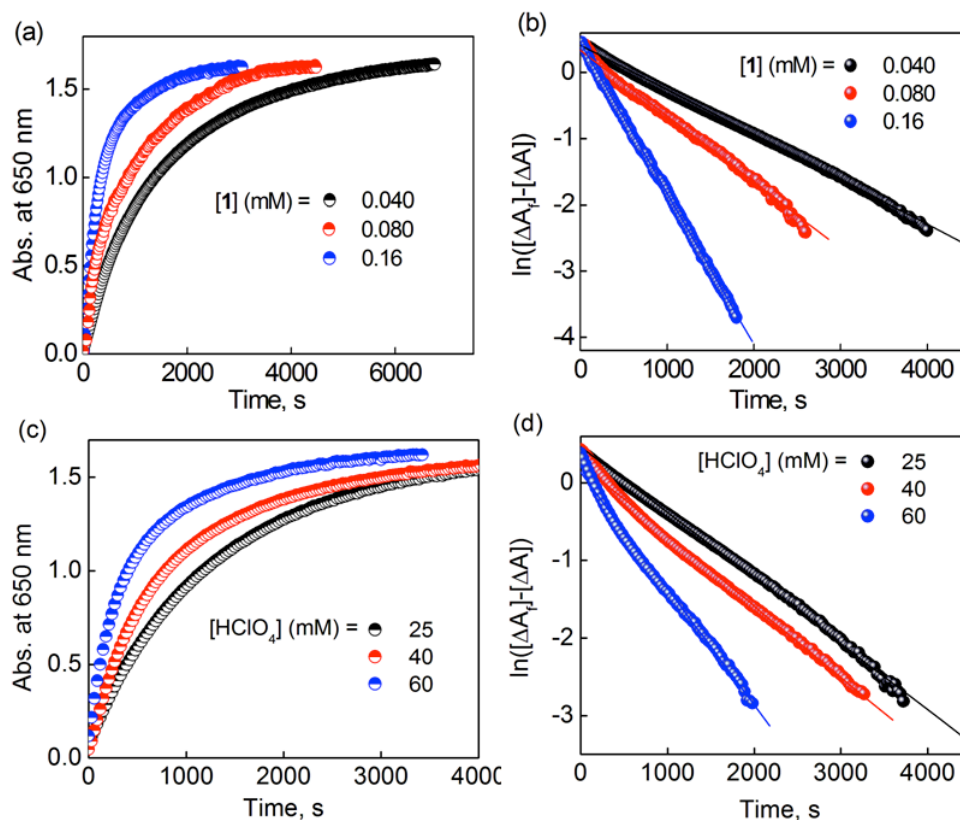

**Figure S5.** (a) Time profiles of the absorbance at 650 nm due to  $\text{Me}_2\text{Fc}^+$  and (b) first-order plots of the formation of  $\text{Me}_2\text{Fc}^+$  in the two-electron reduction of  $\text{O}_2$  catalyzed by **1** (0.040 mM (black), 0.080 mM (red) and 0.16 mM (blue)), with  $\text{Me}_2\text{Fc}$  (10 mM) in the presence of  $\text{HClO}_4$  (40 mM) in an acetone solution ( $[\text{O}_2] = 2.2$  mM) at 298 K. (c) Time profiles of the absorbance at 650 nm due to  $\text{Me}_2\text{Fc}^+$  and (d) first-order plots of the formation of  $\text{Me}_2\text{Fc}^+$  in the two-electron reduction of  $\text{O}_2$  catalyzed by **1** (0.080 mM) with  $\text{Me}_2\text{Fc}$  (10 mM) in the presence of various concentrations of  $\text{HClO}_4$  (25 mM (black), 40 mM (red) and 60 mM (blue)) in an acetone solution containing  $\text{O}_2$  ( $[\text{O}_2] = 2.2$  mM) at 298 K.

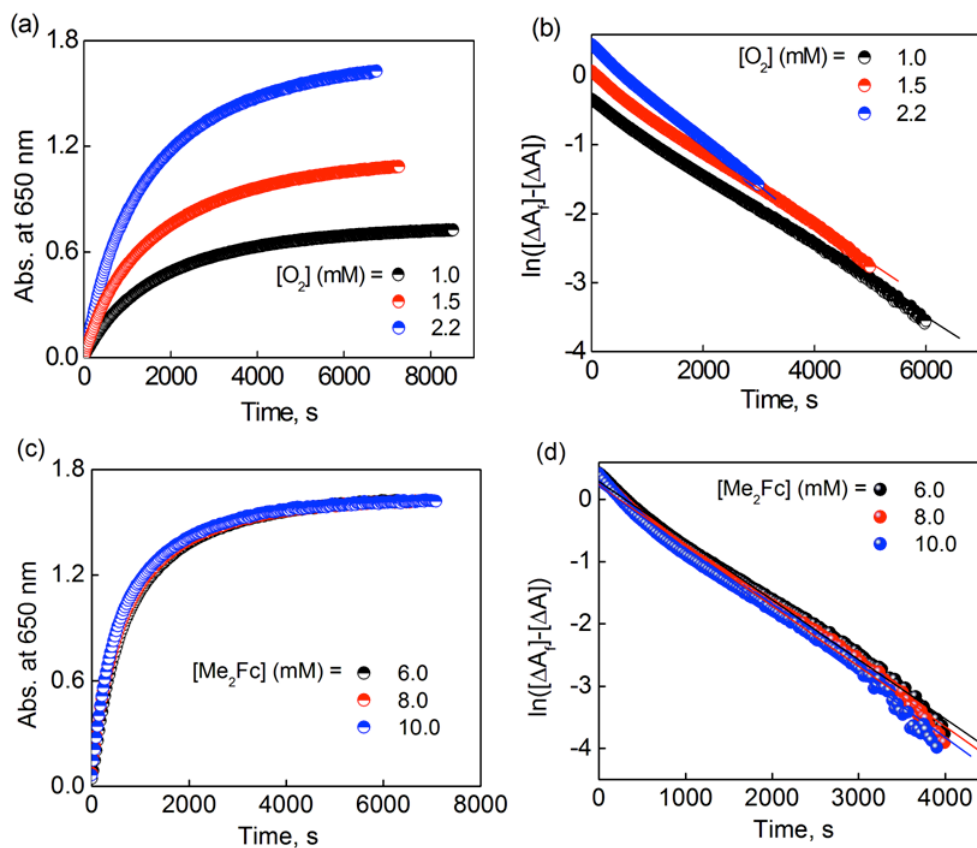

**Figure S6.** (a) Time profiles of the absorbance at 650 nm due to Me<sub>2</sub>Fc<sup>+</sup> and (b) first-order plots of the formation of Me<sub>2</sub>Fc<sup>+</sup> in the two-electron reduction of O<sub>2</sub> (1.0 mM (black), 1.5 mM (red) and 2.2 mM (blue)) catalyzed by **1** (0.040 mM) with Me<sub>2</sub>Fc (10 mM) in the presence of HClO<sub>4</sub> (40 mM) in an acetone solution at 298 K. (c) Time profiles of the absorbance at 650 nm due to Me<sub>2</sub>Fc<sup>+</sup> and (b) first-order plots of the formation of Me<sub>2</sub>Fc<sup>+</sup> in the two-electron reduction of O<sub>2</sub> ([O<sub>2</sub>] = 2.2 mM) catalyzed by **1** (0.040 mM) with Me<sub>2</sub>Fc (6.0 mM (black), 8.0 mM (red) and 10 mM (blue)) in the presence of HClO<sub>4</sub> (40 mM) in an acetone solution at 298 K.

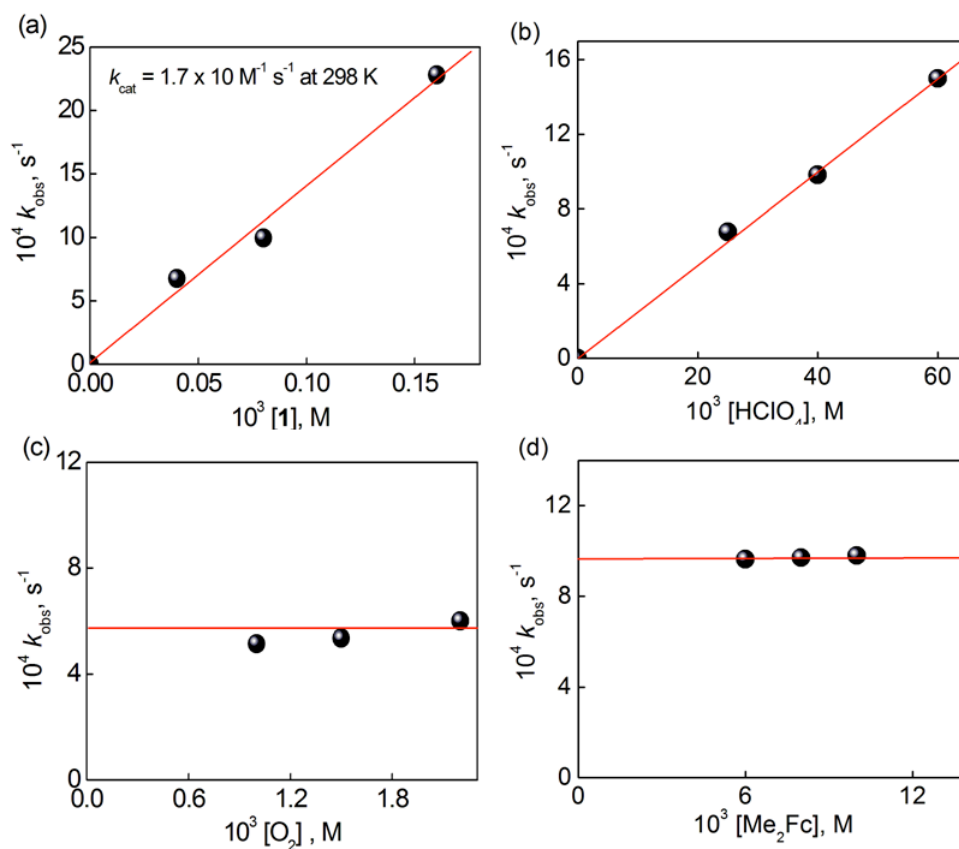

**Figure S7.** (a) Plot of  $k_{\text{obs}}$  versus  $[1]$  for the two-electron reduction of  $\text{O}_2$  ( $[\text{O}_2] = 2.2 \text{ mM}$ ) catalyzed by **1** with  $\text{Me}_2\text{Fc}$  (10 mM) in the presence of  $\text{HClO}_4$  (40 mM) in an acetone solution at 298 K. (b) Plot of  $k_{\text{obs}}$  versus  $[\text{HClO}_4]$  for the two-electron reduction of  $\text{O}_2$  by  $\text{Me}_2\text{Fc}$  (10 mM) catalyzed by **1** (0.080 mM) in an acetone solution containing  $\text{O}_2$  (2.2 mM) at 298 K. (c) Plot of  $k_{\text{obs}}$  versus  $[\text{O}_2]$  for the two-electron reduction of  $\text{O}_2$  catalyzed by **1** (0.040 mM) with  $\text{Me}_2\text{Fc}$  (10 mM) in the presence of  $\text{HClO}_4$  (40 mM) in an acetone solution at 298 K. (d) Plot of  $k_{\text{obs}}$  versus  $[\text{Me}_2\text{Fc}]$  for the two-electron reduction of  $\text{O}_2$  catalyzed by **1** (0.040 mM) with  $\text{Me}_2\text{Fc}$  in the presence of  $\text{HClO}_4$  (40 mM) in an acetone solution containing  $\text{O}_2$  ( $[\text{O}_2] = 2.2 \text{ mM}$ ) at 298 K.



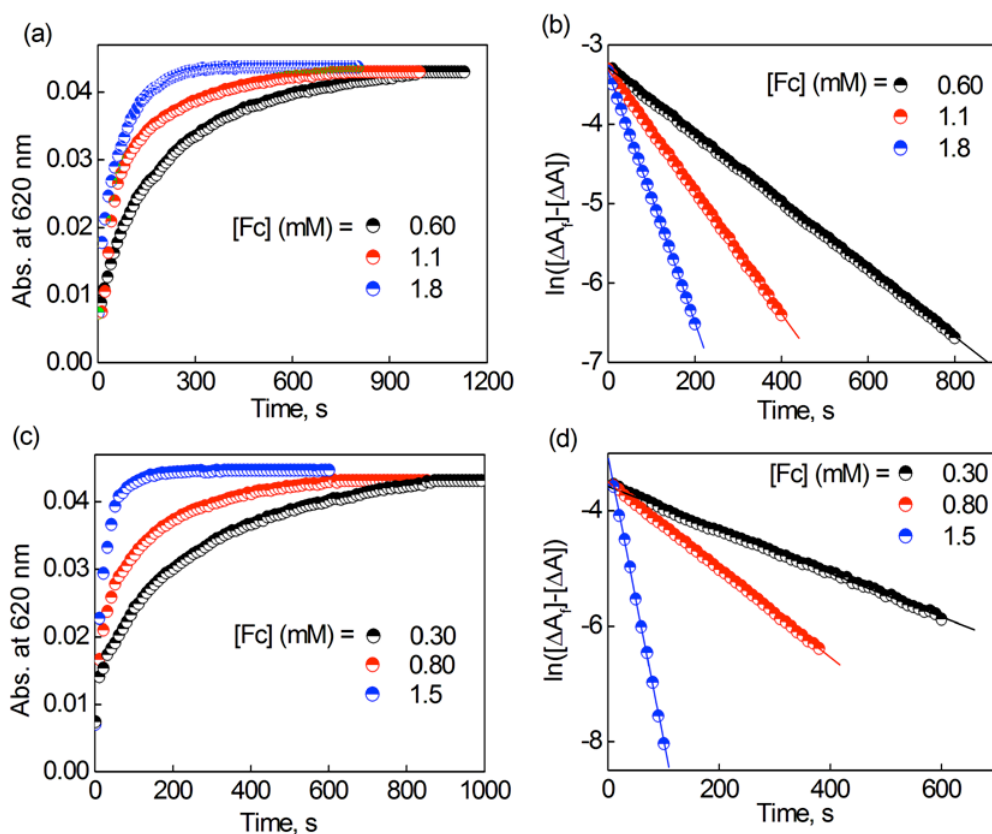

**Figure S8.** (a) Time profiles of the absorbance at 620 nm due to  $\text{Fc}^+$  and (b) first-order plots of the formation of  $\text{Fc}^+$  in the electron transfer reaction from Fc (0.60 mM (black), 1.1 mM (red) and 1.8 mM (blue)) to **1** (0.10 mM) in acetone at 193 K. (c) Time profiles of the absorbance at 620 nm due to  $\text{Fc}^+$  and (d) first-order plots of the formation of  $\text{Fc}^+$  in the electron transfer reaction from Fc (0.30 mM (black), 0.80 mM (red) and 1.5 mM (blue)) to **1** (0.10 mM) in acetone at 203 K.

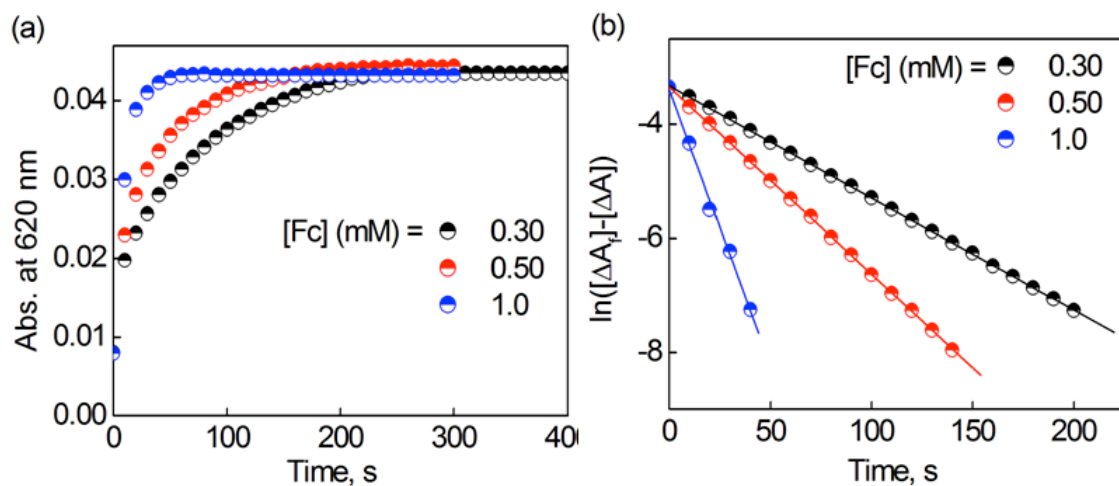

**Figure S9.** (a) Time profiles of the absorbance at 620 nm due to  $\text{Fc}^+$  and (b) first-order plots of the formation of  $\text{Fc}^+$  in the electron transfer reaction from Fc (0.30 mM (black), 0.50 mM (red) and 1.0 mM (blue)) to **1** (0.10 mM) in acetone at 213 K.

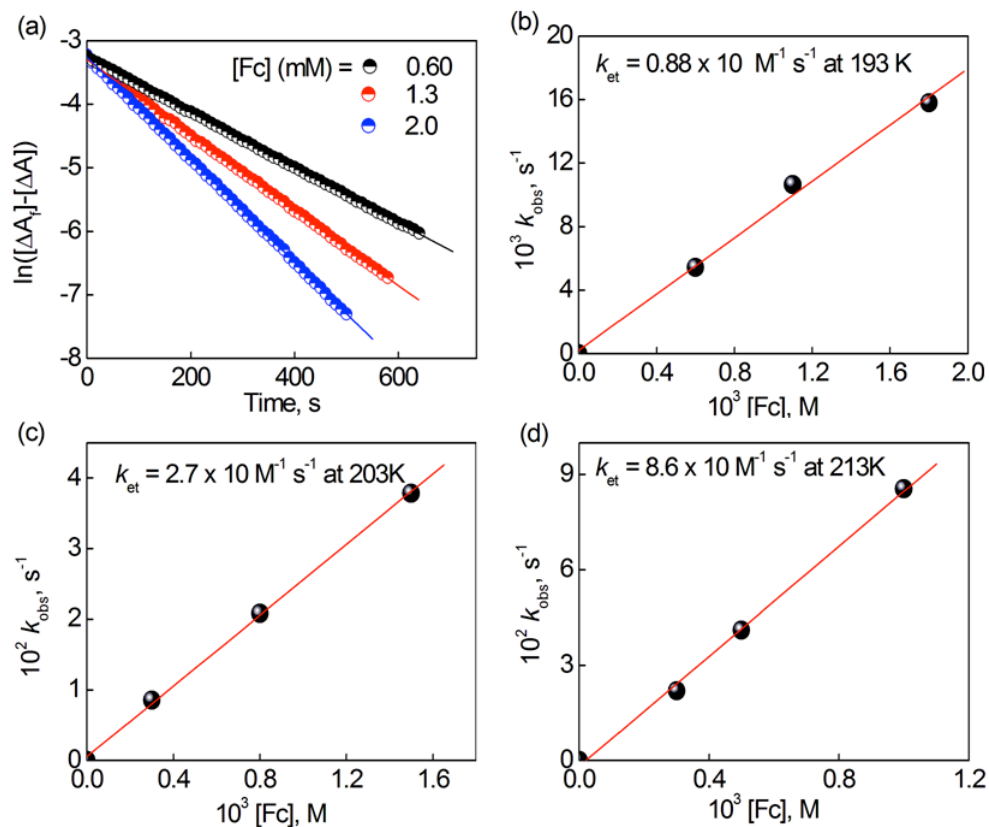

**Figure S10.** (a) First-order plots of the formation of Fc<sup>+</sup> in the electron transfer reaction from Fc (0.60 mM (black), 1.3 mM (red) and 2.0 mM (blue)) to **1** (0.10 mM) in acetone at 183 K. (b,c,d) Plot of  $k_{\text{obs}}$  versus [Fc] in the electron transfer from Fc to [Cu<sup>II</sup>(tepa)]<sup>2+</sup> (**1**) (0.10 mM) in an acetone solution at (b) 193 K, (c) 203 K and (d) 213 K.

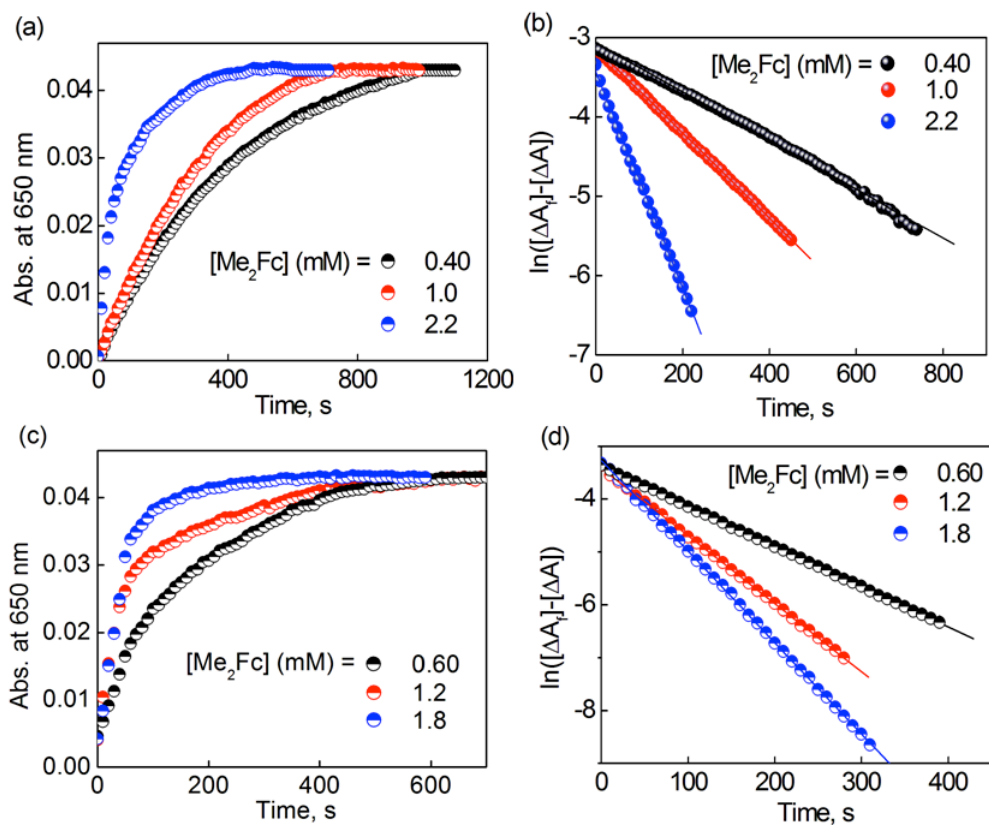

**Figure S11.** (a) Time profiles of the absorbance at 650 nm due to  $\text{Me}_2\text{Fc}^+$  and (b) first-order plots of the formation of  $\text{Me}_2\text{Fc}^+$  in the electron transfer reaction from  $\text{Me}_2\text{Fc}$  (0.40 mM (black), 1.0 mM (red) and 2.2 mM (blue)) to **1** (0.12 mM) in acetone at 183 K. (c) Time profiles of the absorbance at 650 nm due to  $\text{Me}_2\text{Fc}^+$  and (d) first-order plots of the formation of  $\text{Me}_2\text{Fc}^+$  in the electron transfer reaction from  $\text{Me}_2\text{Fc}$  (0.60 mM (black), 1.2 mM (red) and 1.8 mM (blue)) to **1** (0.12 mM) in acetone at 193 K.

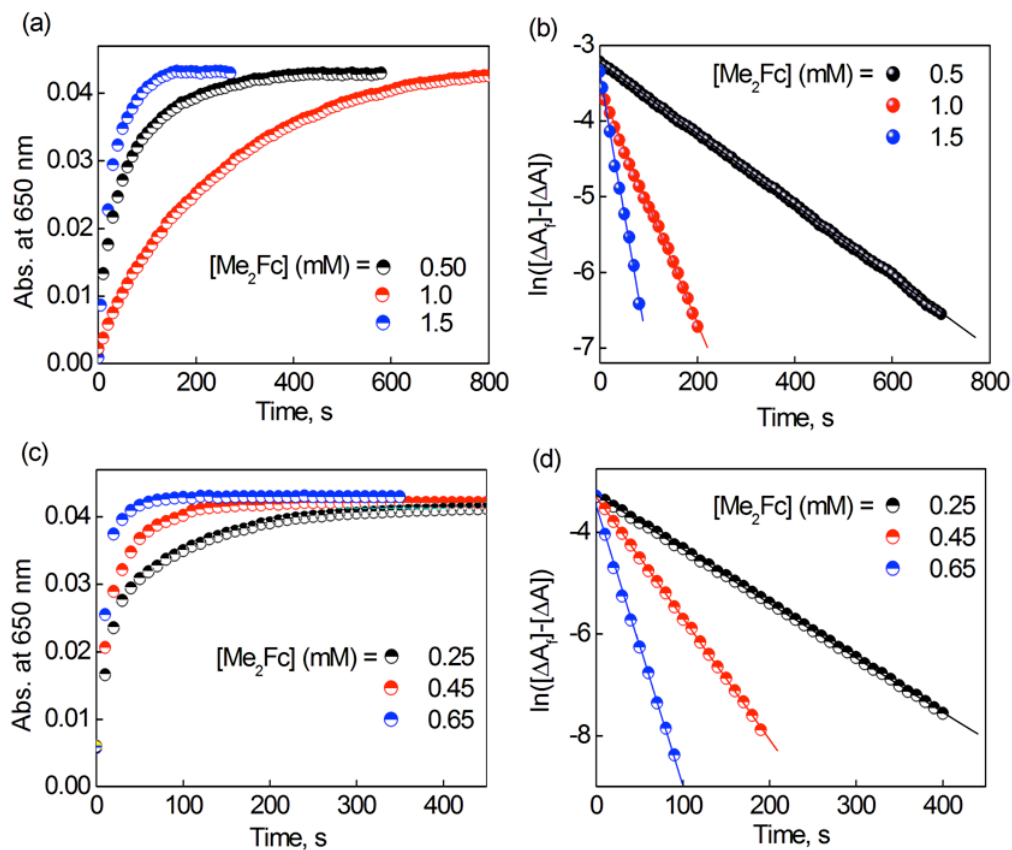

**Figure S12.** (a) Time profiles of the absorbance at 650 nm due to  $\text{Me}_2\text{Fc}^+$  and (b) first-order plots of the formation of  $\text{Me}_2\text{Fc}^+$  in the electron transfer reaction from  $\text{Me}_2\text{Fc}$  (0.50 mM (black), 1.0 mM (red) and 1.5 mM (blue)) to **1** (0.12 mM) in acetone at 203 K. (c) Time profiles of the absorbance at 650 nm due to  $\text{Me}_2\text{Fc}^+$  and (d) first-order plots of the formation of  $\text{Me}_2\text{Fc}^+$  in the electron transfer reaction from  $\text{Me}_2\text{Fc}$  (0.25 mM (black), 0.45 mM (red) and 0.65 mM (blue)) to **1** (0.12 mM) in acetone at 213 K.

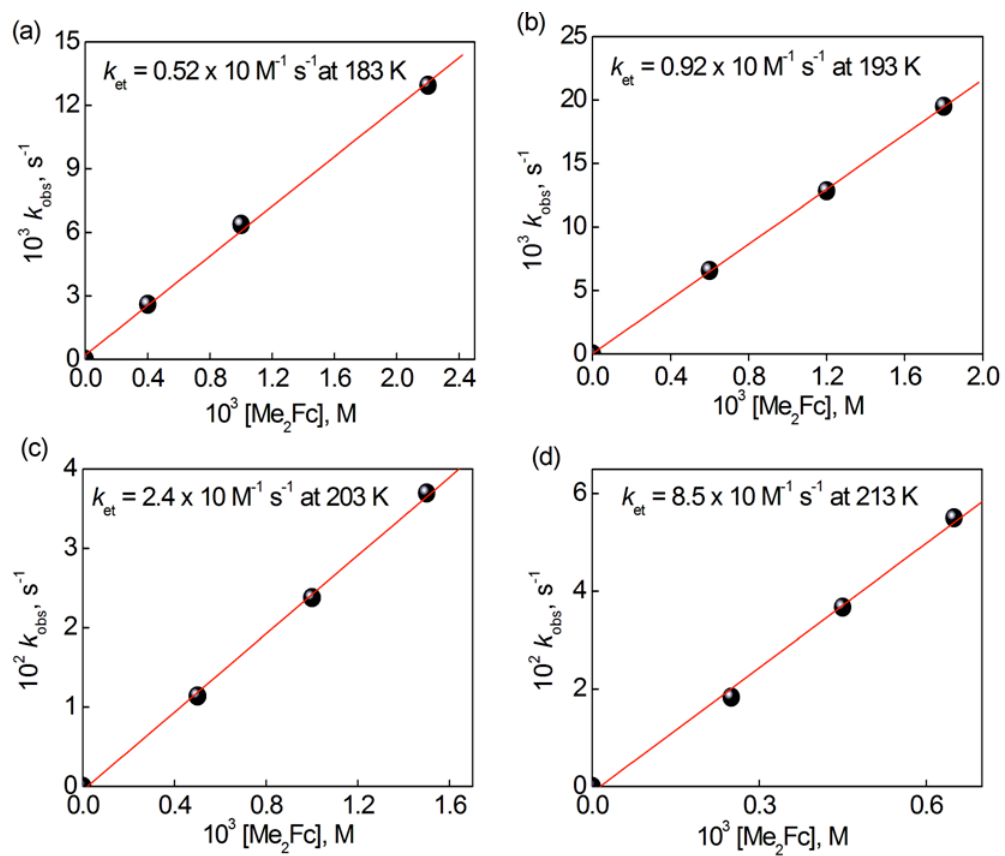

**Figure S13.** Plot of  $k_{\text{obs}}$  versus  $[\text{Me}_2\text{Fc}]$  in the electron transfer from  $\text{Me}_2\text{Fc}$  to  $[\text{Cu}^{\text{II}}(\text{tepa})]^{2+}$  (1) (0.12 mM) in an acetone solution at (a) 183 K, (b) 193 K, (c) 203 K and (d) 213 K.

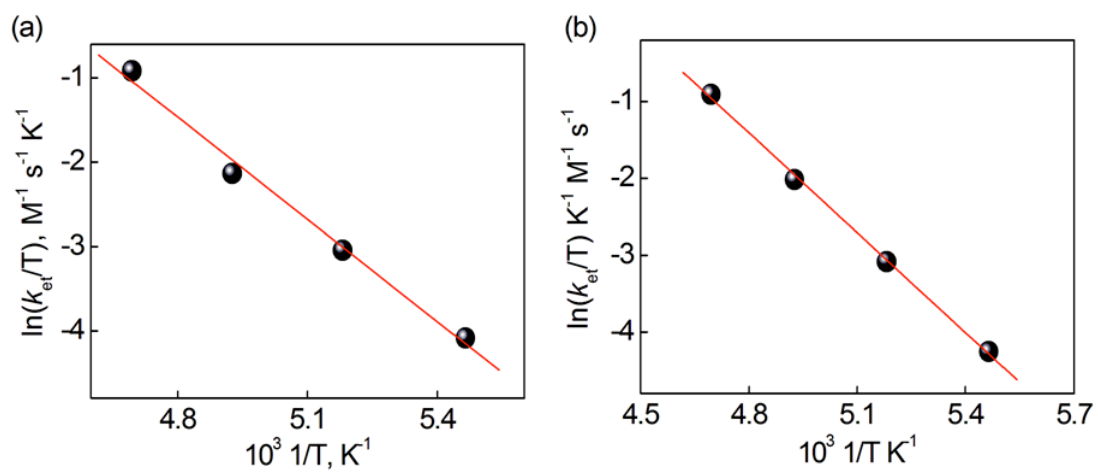

**Figure S14.** Eyring plot,  $\ln(k_{et}/T)$  vs  $1/T$ , of the rate constants ( $k_{et}$ ) of electron transfer from (a)  $Me_2Fc$  and (b)  $Fc$  to **1** in acetone.

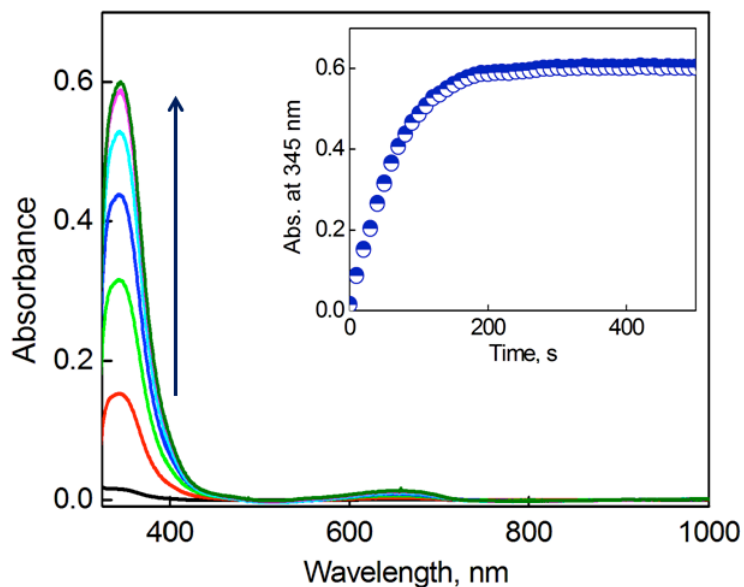

**Figure S15.** Formation of the hydroperoxo complex,  $[\text{Cu}^{\text{II}}(\text{tepa})(\text{OOH})]^+$  (**3**) ( $\lambda_{\text{max}}=345 \text{ nm}$ ) in the reaction of  $[\text{Cu}^{\text{I}}(\text{tepa})]^+$  (0.16 mM), which was generated by reacting  $[\text{Cu}^{\text{II}}(\text{tepa})]^{2+}$  (0.16 mM) with Fc (0.16 mM) at 298K, with  $\text{O}_2$  (2.2 mM) in presence of  $\text{HClO}_4$  (3.0 mM) in acetone at 193 K. Inset shows the time profile of the absorbance at 345 nm due to **3**.



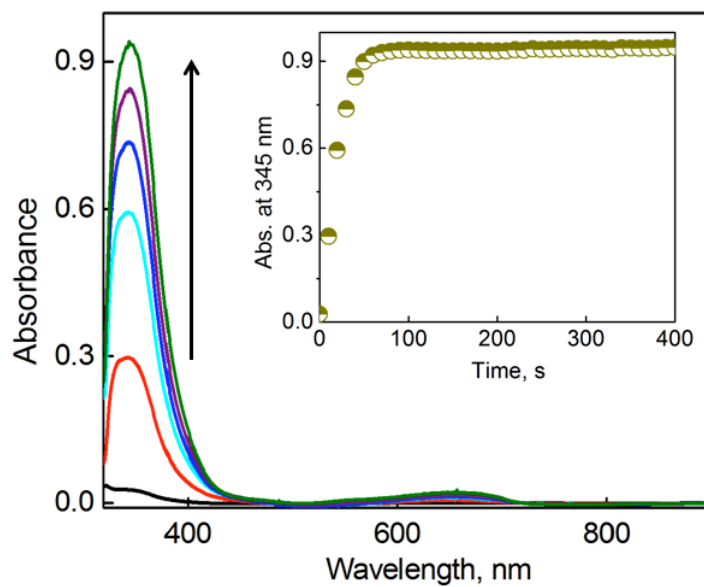

**Figure S16.** Spectral change **observed** in the reaction of  $[\text{Cu}^{\text{II}}(\text{tepa})]^{2+}$  (**1**) (0.13 mM) with  $\text{H}_2\text{O}_2$  (1.3 mM) in the presence of  $\text{Me}_4\text{NOH}$  (0.26 mM) in acetone at 193 K. Inset shows the time profile for the formation of  $[\text{Cu}^{\text{II}}(\text{tepa})(\text{OOH})]^+$  (**3**) at 345 nm.

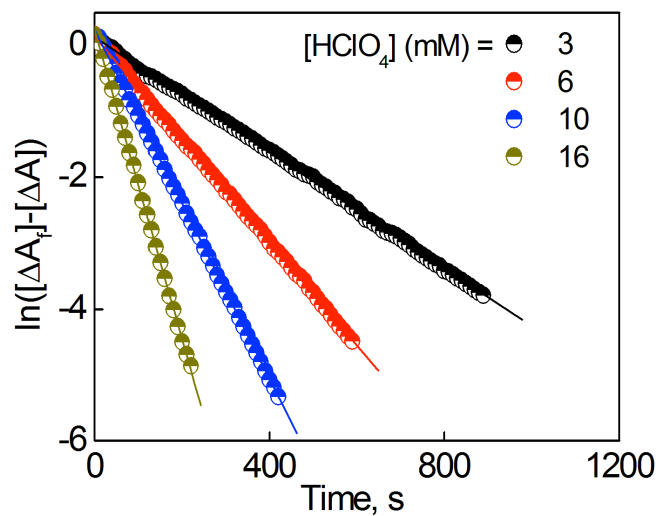

**Figure S17.** First-order plots of the formation of  $[\text{Cu}^{\text{II}}(\text{tega})(\text{OOH})]^+$  (**3**) for the  $\text{O}_2$  (2.2 mM) binding step to  $[\text{Cu}^{\text{I}}(\text{tega})]^+$  (**2**) (0.18 mM) ( $[\text{Cu}^{\text{I}}(\text{tega})]^+$  was generated by room temperature mixing of  $[\text{Cu}^{\text{II}}(\text{tega})]^{2+}$  (0.18 mM) with Fc (0.36 mM)) in the presence of various concentrations of  $\text{HClO}_4$  (3.0 mM (black), 6.0 mM (red), 10 mM (blue) and 16 mM (dark yellow)) in an acetone solution at 193 K.

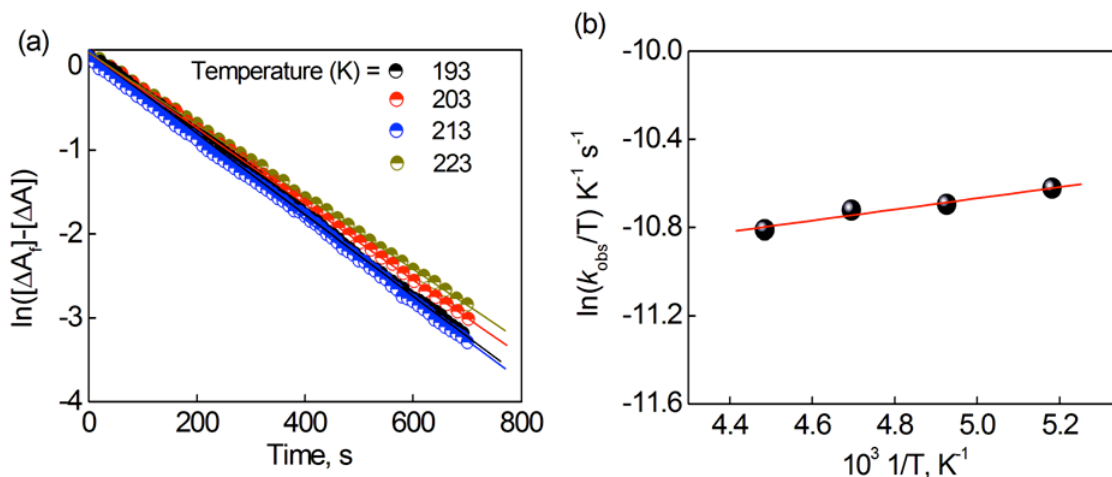

**Figure S18.** (a) First-order plots of the formation of  $[\text{Cu}^{\text{II}}(\text{tepa})(\text{OOH})]^+$  in the  $\text{O}_2$  ( $[\text{O}_2] = 2.2$  mM) binding step in presence of  $\text{HClO}_4$  (3.0 mM) with  $[\text{Cu}^{\text{I}}(\text{tepa})]^+$  (**2**) (0.16 mM) ( $[\text{Cu}^{\text{I}}(\text{tepa})]^+$  was produced from room temperature mixing of  $[\text{Cu}^{\text{II}}(\text{tepa})]^{2+}$  (0.16 mM) with  $\text{Fc}$  (0.32 mM)) at different temperatures (193 K (black), 203 K (red), 213 K (blue) and 223 K (dark yellow)). (b) Eyring plot,  $\ln(k_{\text{obs}}/T)$  vs  $1/T$ , of the rate constants ( $k_{\text{obs}}$ ) obtained from  $\text{O}_2$  binding to **2** with  $\text{HClO}_4$  in acetone.

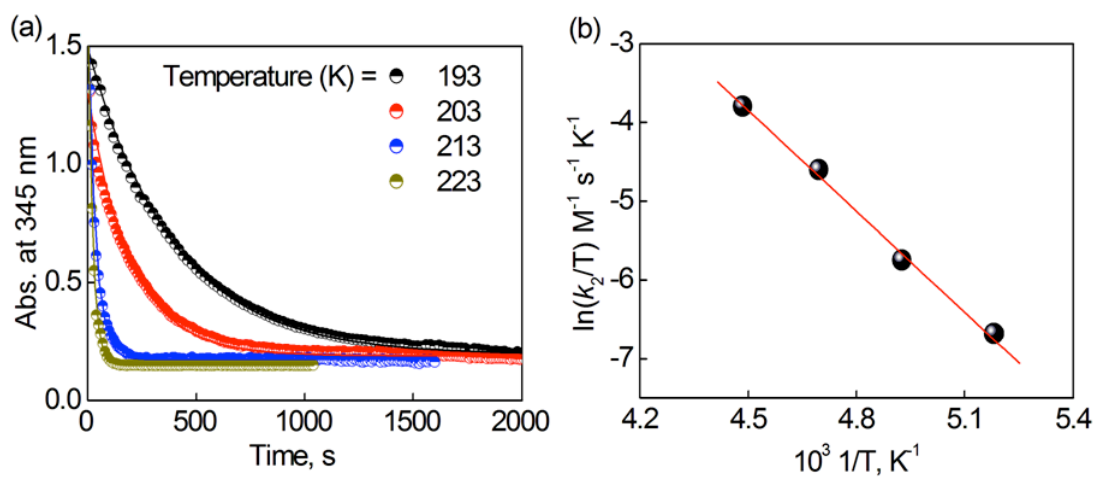

**Figure S19.** (a) Time profiles of the decay of  $[\text{Cu}^{\text{II}}(\text{tepa})(\text{OOH})]^+$  (**3**; 0.20 mM) monitored at 345 nm in presence of  $\text{HClO}_4$  (8.0 mM) at different temperatures (193 K (black), 203 K (red), 213 K (blue) and 223 K (dark yellow)). (b) Eyring plot,  $\ln(k_2/T)$  vs  $1/T$ , of the rate constants ( $k_2$ ) obtained from protonation of **3** (0.20 mM) with  $\text{HClO}_4$  (8.0 mM) in acetone.
